# Supplementary material for: Spatio-Semantic Graphs From Picture Description: Applications to Detection of Cognitive Impairment
Source: Front Neurol. 2021 Dec 9;12:795374. doi: 10.3389/fneur.2021.795374 (PMC8696356; doi:10.3389/fneur.2021.795374)
Supplement: Supplementary file 2 [file Table_2.XLSX]

## Sheet: Sheet1
Sample Characteristics Table Per Diagnosis Group
dx	Female	Male	Avg. Age	St.Dev. Age	Avg. Years of Education	St.Dev. Years of Education	Avg. PACC3*	St.Dev. PACC3
0	659	276	62.0506	6.8335	16.0033	2.76546	0.156455	0.659679
1	110	71	63.5822	5.97021	16.1098	2.76703	-0.783547	0.672005
2	10	4	59.3671	5.77587	14.0769	2.62874	-1.13499	0.836407
3	134	85	70.6254	8.43742	12.5395	2.97451	-1.30594	0.769991
*PACC3 (Preclinical Alzheimer Cognitive Composite) scores assess cognitive function across a variety of tests; PACC3 is z-scored, and a score of -1 indicates 1 standard deviation below the mean.
